# Supplementary material for: Application Options of the Sustainable Child Development Index (SCDI)—Assessing the Status of Sustainable Development and Establishing Social Impact Pathways
Source: Int J Environ Res Public Health. 2018 Jul 2;15(7):1391. doi: 10.3390/ijerph15071391 (PMC6068622; doi:10.3390/ijerph15071391)
Supplement: Supplementary file 1 [file ijerph-15-01391-s001.xlsx]

## Sheet: S1
S1 – Statistical data collected for the seven indicators considered in the path analysis
The SCDI criterion	Adolescent fertility	Children married or in union	Children involved in child labor	Household and ambient air pollution	Public expenditure on tertiary education	Enrolment in tertiary education	Completion of tertiary education
Indicator	Adolescent fertility rate (per 1000 girls aged 15-19 years)	Percentage of women aged 20 to 24 years who were first married or in union before ages 18	Percentage of children aged 5-14 engaged in child labour	Mortality rate attributed to household and ambient air pollution (per 100,000 population)	Government expenditure on tertiary education as a percentage of GDP (%)	Gross enrolment ratio, tertiary, both sexes (%)	Gross graduation ratio from first degree programmes (ISCED 6 and 7) in tertiary education, both sexes (%)
Reference year of data	Year 2015	Year 2003-2015	Year 2003-2015	Year 2012	Year 2003-2015	Year 2003-2015	Year 2003-2015
Data source	World Bank (2017)	United Nations Children’s Funds (2017)		World Health Organization (2017)	United Nations Educational, Scientific and Cultural Organization (2017)
Number of addressed country	184	123	105	192	159	170	132
Afghanistan	71.2034	32.8	29.4	113	0.52927	8.6628
Albania	21.8354	9.6	5.1	171	0.77616	58.1099	36.813
Algeria	10.4716	2.5	5	32	1.17446	36.9223	32.1763
Andorra				27	0.17813
Angola	161.932			104	0.24872	9.30802
Antigua and Barbuda	43.8648			22	0.18783	23.4862	2.01478
Argentina	63.7888		4.4	26	1.08662	82.9174	11.041
Armenia	22.4606	7.2	3.9	125	0.35701	44.3095	37.4855
Australia	13.844			0.4	1.38673	90.3065	72.5496
Austria	6.786			34	1.78829	81.5405	34.8579
Azerbaijan	60.9936	11	6.5	68	0.35624	25.4832	17.6749
Bahamas	28.699			20
Bahrain	13.4214			11		43.2632	8.96639
Bangladesh	82.55	52.3	4.3	68	0.38518	13.4408	7.27001
Barbados	39.4398	10.7	1.9	18	2.58178	65.4322	29.9233
Belarus	17.551	3.2	1.4	104	0.82904	87.9407	63.6066
Belgium	8.0566			30	1.45176	75.0368	44.4329
Belize	65.135	25.9	3.2	19	0.83459	23.2904	6.7792
Benin	81.775	31.9	15.3	92	0.96566	15.3628
Bhutan	20.179	25.8	2.9	60	0.61192	10.9269
Bolivia (Plurinational State of)	70.431	21.7	26.4	52	1.91043	38.3906
Bosnia and Herzegovina	8.1686	3.5	5.3	224
Botswana	30.9728		9	38	3.99857	27.5311	6.74246
Brazil	66.7434	35.6	8.1	21	1.0885	50.6049	27.121
Brunei Darussalam	20.7876			0.2	1.07039	30.8448	12.9364
Bulgaria	36.8366			175	0.64651	73.9342	49.561
Burkina Faso	107.151	51.6	39.2	96	0.55458	4.77591	2.10101
Burundi	27.8548	20.4	26.3	106	1.3126	4.96606	4.08433
Cambodia	52.1718	18.5	19.3	71	0.12333	13.0883	4.21479
Cameroon	102.36	38.4	47	90	0.30927	17.4779
Canada	9.4578			5.4	1.64183		39.562
Cape Verde	73.1564	18	6.4	58	0.78981	21.7078	5.71207
Central African Republic	90.6588	67.9	28.5	96	0.33403	2.77416
Chad	129.752	68.1	26.1	122	0.90338	3.44539
Chile	47.5032		6.6	22	1.26438	88.5773	12.9621
China	7.2612			163		43.3918	25.7052
Colombia	48.6822	23	9.7	24	0.96025	55.6573	21.1114
Comoros	67.1044	31.6	22	63	0.45221	8.92842	4.95202
Congo	116.122	32.6	23.3	90	0.70534	9.7188
Cook Islands	119			10	0.3461	44.6062
Costa Rica	56.0262	21.2	4.1	19	1.59697	53.6297	50.3252
Côte d'Ivoire	135.626	33.2	26.4	90	1.07955	9.15527
Croatia	9.17			90	1.00132	69.0525	48.5432
Cuba	45.1096	26		51	2.981	36.2804	36.618
Cyprus	4.8922			20	1.07783	60.1012	26.6334
Czech Republic	9.6826			59	0.87821	64.9667	39.0339
Democratic People's Republic of Korea	0.5222			234		28.0594	20.0905
Democratic Republic of the Congo	122.277	37.3	38.4	116	0.49293	6.64076
Denmark	3.9608			20	2.32016	82.787	55.7201
Djibouti	21.1816	5.4	7.7	40	0.73931	4.98506	2.44367
Dominica				28
Dominican Republic	97.3396	36.5	12.8	29	0.29718	50.1164	22.305
Ecuador	75.5964	22.2	3	15	2.15968	40.4809	22.4897
Egypt	51.3308	17.4	7	52		36.2285	25.032
El Salvador	64.9156	25.4	19	45	0.27901	29.1311	12.2139
Equatorial Guinea	107.531	29.5	27.8	98
Eritrea	53.0018	40.7		76	1.00444	2.56538	1.21362
Estonia	12.4362			54	1.43786	69.5504	43.5253
Ethiopia	56.6122	41	27.4	57	1.92221	8.12604	4.69609
Fiji	45.1952			77	0.8761	16.1371	8.71907
Finland	6.3768			6	2.00083	87.2897	53.0009
France	8.8148			17	1.24011	64.3905	47.0228
Gabon	97.692	21.9	13.4	47	1.00851	8.4354	5.90915
Gambia	112.463	30.4	19.2	71	0.29692	3.10428	0.1124
Georgia	38.3292	14	18.4	292	0.38022	43.4195	24.5728
Germany	6.4276			33	1.31668	68.2656	32.7927
Ghana	66.1256	20.7	21.8	81	1.12853	16.2305	9.21128
Greece	7.2346			45	1.43254	113.872	27.4169
Grenada	29.5644			25	0.38352	91.1477	60.4489
Guatemala	80.088	30.3	25.8	43	0.40755	21.8468	1.4386
Guinea	139.572	51.7	28.3	88	1.25593	10.8493	8.5031
Guinea-Bissau	87.5292	22	38	105	0.08471	2.50137
Guyana	87.5772	23	18.3	43	0.16159	12.4806	2.9814
Haiti	38.88	17.5	24.4	113
Honduras	64.2684	33.6	15.3	53	0.89639	22.0594	10.9112
Hungary	17.7074			123	0.7664	50.8622	34.0991
Iceland	5.653			6.4	1.51145	81.2604	61.8548
India	23.2924	47.4	11.8	130	1.0961	26.8749	28.701
Indonesia	49.249	13.6	6.9	84	0.56751	24.2549	15.1704
Iran (Islamic Republic of)	26.3422	16.7	11.4	35	0.8613	71.8811	32.0686
Iraq	84.8498	24.3	4.7	32		16.0574	10.8471
Ireland	10.0948			17	1.14541	83.7778	42.3326
Israel	9.3078			16	0.87836	64.7468	45.273
Italy	5.9352			35	0.79907	62.4961	38.2045
Jamaica	58.7846	7.9	3.3	43	0.94967	27.2203
Japan	3.9706			24	0.74577	63.3626	47.0874
Jordan	22.6438	8.4	1.6	22		44.8695	44.3313
Kazakhstan	27.191	6.1	2.2	93	0.42527	46.0399	67.1918
Kenya	90.219	22.9		57	0.68951	4.04682
Kiribati	16.3802	20.3		48
Kuwait	9.4458			14	1.22579	27.027	12.1071
Kyrgyzstan	39.1966	11.6	25.8	100	0.25623	46.9014	33.9849
Lao People's Democratic Republic	63.734	35.4	10.1	108	0.45858	16.9059	12.883
Latvia	13.287			115	1.12638	67.0397	34.5982
Lebanon	12.1846	6.1	1.9	30	0.739	38.4848	28.0858
Lesotho	93.1736	18.8		75	4.13359	9.8422	3.33994
Liberia	107.121	35.9	20.8	70	0.87038	11.6386
Libya	6.1582			33		61.1371
Lithuania	10.3996			73	1.32663	68.5314	57.4757
Luxembourg	5.7284			20	0.51658	19.4074	8.47362
Madagascar	114.82	41.2	22.9	84	0.41478	4.77556	1.78745
Malawi	135.349	46.3	39.3	72	1.35763	0.79773	0.49435
Malaysia	13.7166			22	1.35397	26.0741	15.1787
Maldives	6.214	3.9		21	0.66585	16.2274
Mali	173.741	55	21.4	116	0.80721	6.87478
Malta	16.3804			31	1.5109	47.4219	35.4408
Marshall Islands		26.3		26		42.8618
Mauritania	77.9034	34.3	14.6	64	0.33931	5.62173	3.48536
Mauritius	28.3166			21	0.33329	36.6676
Mexico	62.2038	22.9	4.2	24	1.13305	29.9409	20.2795
Micronesia (Fed. States of)	14.2636			41
Monaco				23	0.05434
Mongolia	15.0022	4.7	15.2	132	0.17607	68.567	52.2614
Montenegro	12.031	4.5	12.5	124		55.3446
Morocco	31.3652	15.9	8.3	29	1.06245	28.1436	4.77151
Mozambique	136.928	48.2	22.2	65	0.88761	6.39052	0.23286
Myanmar	16.2474			127		13.5282	13.0978
Namibia	76.2126	6.9		48	1.92755	9.33008	7.13246
Nauru		26.8		2.9
Nepal	71.2882	36.6	37.4	104	0.40083	14.9399	9.72058
Netherlands	3.8842			24	1.69039	78.5011	48.2467
New Zealand	23.2522			0.5	1.62828	83.9313	55.975
Nicaragua	88.0554	40.6	14.5	62	1.1684
Niger	201.163	76.3	30.5	110	0.93384	1.71459	0.96152
Nigeria	109.304	42.8	24.7	90		10.0709
Niue				5.7
Norway	5.8552			13	1.91264	76.7832	47.5123
Oman	7.5474			13	1.12581
Pakistan	38.322	21		89	0.60315	9.92739
Palau				0.9		61.8638
Panama	73.7318	26.4	5.6	25	0.70507	38.7394	24.1273
Papua New Guinea	54.432	21.3		44
Paraguay	56.8552	17.9	27.6	57	1.10989	35.0808
Peru	48.4478	18.6	33.5	33	0.63987	40.5128
Philippines	62.6538	15	11.1	83	0.31707	35.7533	19.6369
Poland	13.135			69	1.18474	68.1136	47.6031
Portugal	9.4496		3.4	17	0.91373	61.8742	51.4121
Qatar	10.4832	4.2		9		14.5181	3.57979
Republic of Korea	1.5886			24	1.04882	93.1791	46.8556
Republic of Moldova	22.028	12.2	16.3	115	1.28407	41.2135	33.3586
Romania	34.034			138	0.67741	53.2202	45.1506
Russian Federation	22.7328			110	0.81674	80.3941	61.4839
Rwanda	25.6248	8.1	28.5	68	0.79207	7.89708	2.93601
Saint Kitts and Nevis					0.42754	79.5645
Saint Lucia	53.4248	7.5	3.9	26	0.21526	16.7659	3.27576
Saint Vincent and the Grenadines	50.3332			26	0.35649
Samoa	24.2898	10.8		32
San Marino					0.25651	59.849
Sao Tome and Principe	83.456	34.4	26	70	0.36068	13.406
Saudi Arabia	8.406			28		63.0662	28.5307
Senegal	76.8768	32.3	14.5	43	2.13304	10.3867
Serbia	18.6946	3.2	9.5	137	1.29073	58.2877	23.593
Seychelles	56.8962			1.1	1.17263	14.2562	10.2273
Sierra Leone	116.732	38.9	37.4	142	0.81795
Singapore	3.7956			21	1.02881
Slovakia	19.9398			66	0.97482	52.9235	40.2955
Slovenia	3.6332			42	1.1266	82.9264	60.7241
Solomon Islands	47.3794	22.4		53
Somalia	102.617	45.3	49	117
South Africa	44.4402	5.6		44	0.73471	19.3751	7.98743
South Sudan	63.4292	51.5		95	0.42534
Spain	8.311			15	0.96054	89.6701	51.2238
Sri Lanka	14.153	11.8	2.5	119	0.42237	19.7966	11.0762
State of Palestine		15.3	5.7			44.2832	30.5415
Sudan	72.05	32.9	24.9	64		16.3206	10.0999
Suriname	45.7392	18.8	4.1	23
Swaziland	67.2336	6.5	7.3	63	0.93996	5.32888	8.36437
Sweden	5.695			0.4	1.93958	62.3008	33.4671
Switzerland	2.8402			18	1.34424	57.6722	51.3325
Syrian Arab Republic	38.8766	13.3	4	31	1.24266	44.0486	11.4039
Tajikistan	37.7858	11.6	10	98	0.52037	26.3745	10.7136
Thailand	44.6052	22.1	8.3	65	0.64218	48.8574	26.9894
The former Yugoslav Republic of Macedonia	17.2636	6.9	12.5	129		42.0633	32.126
Timor Leste	45.482	18.9		90	0.31965	18.1497	25.4642
Togo	92.0646	21.8	27.9	81	0.90407	10.626
Tonga	14.8596	5.6		30	0.84871	6.3486
Trinidad and Tobago	30.8354	8.1	0.7	28		11.9512	5.09161
Tunisia	6.8052	1.6	2.1	44	1.58478	34.6066	24.4065
Turkey	26.811	14.7	5.9	51	1.58323	94.7323	31.6781
Turkmenistan	16.0482	7.3		73	0.282	7.98444
Tuvalu		9.9		18
Uganda	108.946	39.7	16.3	70	0.36075	4.48339	1.95701
Ukraine	23.351	9.1	2.4	139	1.84808	82.305
United Arab Emirates	30.0682			7.5
United Kingdom	13.9498			26	1.29719	56.4768	52.6726
United Republic of Tanzania	117.721	36.9	28.8	50	0.74451	3.64732	0.44469
United States	21.1538			12	1.7509	85.7958	40.4149
Uruguay	55.7796	24.6	7.9	23	1.16911	55.5663
Uzbekistan	17.6002	7.2		83		8.78775	11.3542
Vanuatu	42.7458	21.4	15.2	54	0.33869	4.7444
Venezuela (Bolivarian Republic of)	79.0518			21	1.55419	76.9796	18.2631
Viet Nam	39.1486	10.6	16.4	84	0.84932	28.8357	19.5288
Yemen	60.6954	31.9	22.7	57		9.9746
Zambia	87.8574	31.4	40.6	64	0.44695	3.98141
Zimbabwe	108.937	33.5		53	1.41883	8.43327	1.0693

## Sheet: S2
S2 – Results of the correlation analysis of the seven indicators considered in the path analysis
			Mortality rate attributed to household and ambient air pollution (per 100 000 population)	Adolescent fertility rate (per 1000 girls aged 15-19 years)	Gross graduation ratio from first degree programmes (ISCED 6 and 7) in tertiary education, both sexes (%)	Gross enrolment ratio, tertiary, both sexes (%)	Government expenditure on education as % of GDP (%)	Percentage of women aged 20 to 24 years who were first married or in union before ages 18	Percentage of children aged 5-14 engaged in child labour
Spearman correlation coefficient	Mortality rate attributed to household and ambient air pollution (per 100 000 population)	Correlation Coefficient	1	,323**	-,193*	-,340**	-,319**	0.147172	,380**
		Sig. (2-tailed)		7.59646e-06	0.0207752	3.32277e-06	1.60696e-05	0.105737	3.99345e-05
		N	192	184	144	178	176	122	111
	Adolescent fertility rate (per 1000 girls aged 15-19 years)	Correlation Coefficient	,323**	1	-,498**	-,658**	-,218**	,801**	,620**
		Sig. (2-tailed)	7.59646e-06		2.50196e-10	3.50147e-23	0.00423324	6.94821e-28	3.81356e-13
		N	184	184	143	176	171	119	111
	Gross graduation ratio from first degree programmes (ISCED 6 and 7) in tertiary education, both sexes (%)	Correlation Coefficient	-,193*	-,498**	1	,667**	,246**	-,341**	-,440**
		Sig. (2-tailed)	0.0207752	2.50196e-10		4.87147e-20	0.00339566	0.00124752	1.82116e-05
		N	144	143	145	145	140	87	88
	Gross enrolment ratio, tertiary, both sexes (%)	Correlation Coefficient	-,340**	-,658**	,667**	1	,244**	-,480**	-,630**
		Sig. (2-tailed)	3.32277e-06	3.50147e-23	4.87147e-20		0.00134772	4.87923e-08	1.71244e-13
		N	178	176	145	181	170	116	110
	Government expenditure on education as % of GDP (%)	Correlation Coefficient	-,319**	-,218**	,246**	,244**	1	-,205*	-0.147114
		Sig. (2-tailed)	1.60696e-05	0.00423324	0.00339566	0.00134772		0.0312504	0.136155
		N	176	171	140	170	179	111	104
	Percentage of women aged 20 to 24 years who were first married or in union before ages 18	Correlation Coefficient	0.147172	,801**	-,341**	-,480**	-,205*	1	,592**
		Sig. (2-tailed)	0.105737	6.94821e-28	0.00124752	4.87923e-08	0.0312504		3.72375e-11
		N	122	119	87	116	111	123	104
	Percentage of children aged 5-14 engaged in child labour	Correlation Coefficient	,380**	,620**	-,440**	-,630**	-0.147114	,592**	1
		Sig. (2-tailed)	3.99345e-05	3.81356e-13	1.82116e-05	1.71244e-13	0.136155	3.72375e-11
		N	111	111	88	110	104	104	112
**. Correlation is significant at the 0.01 level (2-tailed).
*. Correlation is significant at the 0.05 level (2-tailed).

## Sheet: S3
	S3 – Hypotheses for potential relation between the six selected criteria and the criterion completion of tertiary education
	No. of Hypothesis	Hypothesis of relation	Pathway
	H1	Children married or in union will have a positive relation to adolescent fertility, and will be a predictor of adolescent fertility	P1
	H2	Children married or in union will have a negative relation to enrolment in tertiary education, and will be a predictor of enrolment in tertiary education	P2
	H3	Adolescent fertility will have a negative relation to enrolment in tertiary education, and will be a predictor of enrolment in tertiary education	P3
	H4	Children involved in child labor will have a negative relation to enrolment in tertiary education, and will be a predictor of enrolment in tertiary education	P4
	H5	Public expenditure on tertiary education will have a positive relation to enrolment in tertiary education, and will be a predictor of enrolment in tertiary education	P5
	H6	Household and ambient air pollution will have a negative relation to enrolment in tertiary education, and will be a predictor of enrolment in tertiary education	P6
	H7	Children married or in union will have a negative relation to tertiary education completion, and will be a predictor of completion of tertiary education	P7
	H8	Adolescent fertility will have a negative relation to tertiary education completion, and will be a predictor of completion of tertiary education	P8
	H9	Children involved in child labor will have a negative relation to tertiary education completion, and will be a predictor of completion of tertiary education	P9
	H10	Public expenditure on tertiary education will have a positive relation to tertiary education completion, and will be a predictor of completion of tertiary education	P10
	H11	Household and ambient air pollution will have a negative relation to tertiary education completion, and will be a predictor of completion of tertiary education	P11
	H12	Enrolment in tertiary education will have a negative relation to tertiary education completion, and will be a predictor of completion of tertiary education	P12

## Sheet: S4
	S4 – Results of the three linear regression models of the path analysis
	Linear regression model	Presumed condition	Presumed factor	Pathway	Path coefficient	Coefficient of determination
	1	Adolescent fertility	Children married or in union	P1	0.795**	0.632
	2	Enrolment in tertiary education	Children married or in union	P2	-0.153	0.464
			Adolescent fertility	P3	-0.291*
			Children involved in child labor	P4	-0.261*
			Public expenditure on tertiary education	P5	0.234**
			Household and ambient air pollution	P6	0.12
	3	Completion of tertiary education	Children married or in union	P7	0.007	0.723
			Adolescent fertility	P8	-0.074
			Children involved in child labor	P9	-0.113
			Public expenditure on tertiary education	P10	-0.015
			Household and ambient air pollution	P11	0.161
			Enrolment in tertiary education	P12	0.727**
	*Confidence level = 0.95, **Confidence level= 0.99
